# Supplementary material for: An Overview of Climate Change Impacts on Agriculture and their mitigation strategies
Source: Preprints.org preprint supplement (doi:10.20944/preprints202307.1352.v1), 2023-07-19
Supplement: Supplementary file 1 [file supplementary]

## Supplementary data

# An Overview of Climate Change Impacts on Agriculture and their mitigation strategies

Farhana Bibi<sup>1</sup>, Azizur Rahman<sup>2,\*</sup>

<sup>1</sup> Department of Biosciences, Grand Asian University Sialkot, 51040, Pakistan.

<sup>2</sup> Centre for Climate Change Research, University of Toronto, Toronto, ON M5G 1L5, Canada.

\* Correspondence: mazizur.rahman@utoronto.ca; aziz@climatechangeresearch.ca.

**Table 1: Physiological and biochemical responses of plants upon abiotic stresses**

| Sr. No | Parameter                              | Crop           | Physiological & biochemical responses to stress                                                                                                                  | Ref. |
|--------|----------------------------------------|----------------|------------------------------------------------------------------------------------------------------------------------------------------------------------------|------|
| 1      | Heat stress (32 °C)                    | Tomato         | Decrease in fruit yield, increase in antioxidant content in leaf and fruit                                                                                       | [1]  |
| 2      | Heat Stress (35°C/25°C : day/night)    | Lamb's Lettuce | Decrease in plant biomass and photosynthetic pigments, accumulation of high H <sub>2</sub> O <sub>2</sub> in leaf                                                | [2]  |
| 3      | Salinity Stress (75mM NaCl)            | Rice           | Depletion in cellular water content, higher accumulation of Na <sup>+</sup> , decrease in photosynthetic pigments Chl a and Chl b, Activation of aquaponic genes | [3]  |
| 4      | Heat stress (35-42 °C)                 | Rice           | Decrease in seedlings growth and chlorophyll content, decrease in survival rate by 18-20%, increase in percentage of injury                                      | [4]  |
| 5      | Heat stress (38 °C/ 31 °C : day/night) | Wheat          | Changes in rate of evapotranspiration, increased plants wilting, increase water loss in tissues, decrease in volume                                              | [5]  |
| 6      | Low temperature                        | Cucumber       | Increased electrolytes leakage, hydrogen peroxide levels and intracellular concentration of CO <sub>2</sub> ,                                                    | [6]  |

|    |                                                                              |                                             |                                                                                                                                      |      |
|----|------------------------------------------------------------------------------|---------------------------------------------|--------------------------------------------------------------------------------------------------------------------------------------|------|
|    | stress<br>(9 °C/ 5 °C :<br>day/ night)                                       |                                             | decrease in relative water content, net<br>photosynthetic rate, rate of<br>transpiration, stomatal conductance,<br>and leaf pigments |      |
| 7  | High CO2<br>levels                                                           | Wheat<br><br>(heat<br>tolerant<br>genotype) | Decrease in lysine metabolism, and<br>metabolites including N<br>acetylonithine, overall yield did not<br>improved                   | [7]  |
| 8  | Elevated CO2<br>levels                                                       | Barley                                      | Decrease in specific leaf area and<br>stomatal conductance, decrease in<br>transpiration rate                                        | [8]  |
| 9  | Salinity stress<br>(150-300mM<br>NaCl)                                       | Sugarcane                                   | Decrease in photosynthetic rate,<br>stomatal conductance and<br>photoassimilate transportation from<br>leaves to other plant tissues | [9]  |
| 10 | Salinity stress<br>(250mM NaCl)                                              | Soybean                                     | Decrease in photosynthetic pigments,<br>carbohydrates, phenolic content,<br>flavonoids and antioxidants                              | [10] |
| 11 | Salinity + Heat<br>Stress<br><br>(75mM NaCl +<br>30 C/ 26 C :<br>day/ night) | Rice                                        | Reduced dry and fresh weight of<br>shots, reduced relative water content<br>of leaves                                                | [3]  |

**Table 2: Effect of Biochar on crops and soil properties**

| Sr. No. | Type of Biochar     | Crop       | Treatment effect on soil                                                                                                                           | Treatment effect on crops                                          | Ref. |
|---------|---------------------|------------|----------------------------------------------------------------------------------------------------------------------------------------------------|--------------------------------------------------------------------|------|
| 1.      | Pine needle Biochar | Chick pea  | Treatment resulted in elevated water holding capacity, Buffered the soil pH to 6.5                                                                 | Increase in Biomass and plant fresh weight                         | [11] |
| 2.      | Corn stalk Biochar  | Sugar Beet | Reduction in soil fomesafen residues by 29-46%, increase in soil pH by 3.49%, increase in soil water content by 13. 8%, increase in soil nitrogen, | Increase in growth, development and photosynthetic content of crop | [12] |

|    |                               |                    |                                                                                                         |                                                                                                                                          |      |
|----|-------------------------------|--------------------|---------------------------------------------------------------------------------------------------------|------------------------------------------------------------------------------------------------------------------------------------------|------|
|    |                               |                    | potassium, soil organic matter by 9.68, 17.7 and 11.8%                                                  |                                                                                                                                          |      |
| 3. | Sunflower<br>Biochar          | Millet             | Increased soil water content by 47%, increased soil dissolved organic carbon by 90% and nitrogen by 74% | Increased plants nutrients sodium, potassium and phosphorus, increased leaf relative water content by 40%, improved overall yield by 58% | [13] |
| 4. | Sunflower<br>Plate<br>Biochar | Rice               | Increased soil pH and pH buffering capacity, reduced the available Cd content of soil                   | Reduced the potential risk of cadmium absorption by rice plants                                                                          | [14] |
| 5. | Biochar-<br>Fertilizer        | Chinese<br>Cabbage | Increased the inorganic nitrogen content of soil                                                        | Increased leaf length, width and leaf number. Increased the nitrogen utilization efficiency, amino acids, sugars and vitamin C content   | [15] |
|    |                               | Maize              |                                                                                                         | Increased plants height, stem diameter, ear height and starch content of grains                                                          |      |

## References

- [1] T. Mesa, J. Polo, A. Arabia, V. Caselles, and S. Munné-Bosch, "Differential physiological response to heat and cold stress of tomato plants and its implication on fruit quality," *J. Plant Physiol.*, vol. 268, p. 153581, 2022, doi: <https://doi.org/10.1016/j.jplph.2021.153581>.
- [2] B. Hawrylak-Nowak, S. Dresler, K. Rubinowska, R. Matraszek-Gawron, W. Woch, and M. Hasanuzzaman, "Selenium biofortification enhances the growth and alters the physiological response of lamb's lettuce grown under high temperature stress," *Plant Physiol. Biochem.*, vol. 127, pp. 446–456, 2018, doi: <https://doi.org/10.1016/j.plaphy.2018.04.018>.
- [3] L. Nahar, M. Aycan, S. Hanamata, M. Baslam, and T. Mitsui, "Impact of Single and Combined Salinity and High-Temperature Stresses on Agro-Physiological, Biochemical, and Transcriptional Responses in Rice and Stress-Release," *Plants*, vol. 11, no. 4, 2022, doi: 10.3390/plants11040501.
- [4] S. Aryan *et al.*, "Phenological and physiological responses of hybrid rice under different high-temperature at seedling stage," *Bull. Natl. Res. Cent.*, vol. 46, no. 1, p. 45, 2022, doi: 10.1186/s42269-022-00742-y.

- [5] P. M. P. Correia, J. Cairo Westergaard, A. da Silva, T. Roitsch, E. Carmo-Silva, and J. da Silva, "High-throughput phenotyping of physiological traits for wheat resilience to high temperature and drought stress," *J. Exp. Bot.*, vol. 73, no. 15, pp. 5235–5251, 2022, doi: 10.1093/jxb/erac160.
- [6] B. Amin *et al.*, "Biochemical and Physiological Responses of *Cucumis sativus* Cultivars to Different Combinations of Low-Temperature and High Humidity," *J. Plant Growth Regul.*, vol. 42, no. 1, pp. 390–406, 2023, doi: 10.1007/s00344-021-10556-3.
- [7] L. O. A. Abdelhakim *et al.*, "Elevated CO<sub>2</sub> Improves the Physiology but Not the Final Yield in Spring Wheat Genotypes Subjected to Heat and Drought Stress During Anthesis," *Front. Plant Sci.*, vol. 13, no. March, 2022, doi: 10.3389/fpls.2022.824476.
- [8] Y. Chen, Z. Wei, H. Wan, J. Zhang, J. Liu, and F. Liu, "CO<sub>2</sub> Elevation and Nitrogen Supply Alter the Growth and Physiological Responses of Tomato and Barley Plants to Drought Stress," *Agronomy*, vol. 12, no. 8, 2022, doi: 10.3390/agronomy12081821.
- [9] D. Zhao, K. Zhu, A. Momotaz, and X. Gao, "Sugarcane Plant Growth and Physiological Responses to Soil Salinity during Tillering and Stalk Elongation," *Agriculture*, vol. 10, no. 12, 2020, doi: 10.3390/agriculture10120608.
- [10] P. Mangena, "Role of Benzyladenine Seed Priming on Growth and Physiological and Biochemical Response of Soybean Plants Grown under High Salinity Stress Condition," *Int. J. Agron.*, vol. 2020, p. 8847098, 2020, doi: 10.1155/2020/8847098.
- [11] B. Fatima *et al.*, "Accompanying effects of sewage sludge and pine needle biochar with selected organic additives on the soil and plant variables," *Waste Manag.*, vol. 153, pp. 197–208, 2022, doi: <https://doi.org/10.1016/j.wasman.2022.08.016>.
- [12] X. Li *et al.*, "Influence of Biochar on Soil Properties and Morphophysiology of Sugar Beet Under Fomesafen Residues," *J. Soil Sci. Plant Nutr.*, 2023, doi: 10.1007/s42729-023-01157-y.
- [13] M. al-R. Taheri, A. R. Astarai, A. Lakzian, and H. Emami, "The role of biochar and sulfur-modified biochar on soil water content, biochemical properties and millet crop under saline-sodic and calcareous soil," *Plant Soil*, 2023, doi: 10.1007/s11104-023-05912-z.
- [14] H. Lu *et al.*, "Effects of the increases in soil pH and pH buffering capacity induced by crop residue biochars on available Cd contents in acidic paddy soils," *Chemosphere*, vol. 301, p. 134674, 2022, doi: <https://doi.org/10.1016/j.chemosphere.2022.134674>.
- [15] H. Zhao, T. Xie, H. Xiao, and M. Gao, "Biochar-Based Fertilizer Improved Crop Yields and N Utilization Efficiency in a Maize–Chinese Cabbage Rotation System," *Agriculture*, vol. 12, no. 7, 2022, doi: 10.3390/agriculture12071030.
